# Supplementary material
Source: Springer Nature journal article supplement (https://www.springermedizin.de/resource/supplementary/12998_2011_58_MOESM12_ESM.pdf/9680054)

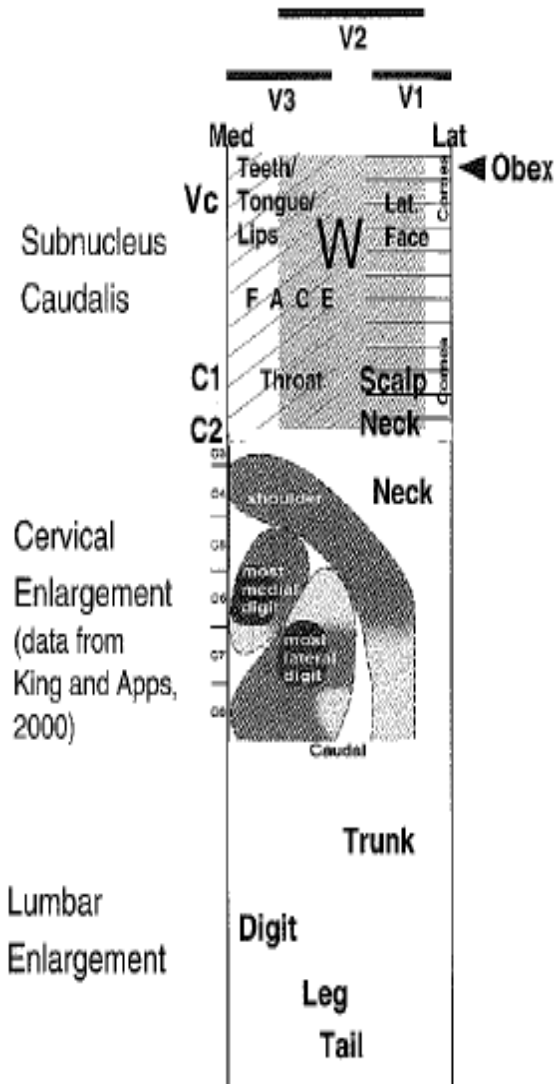

Supplement: MOESM12 [file 9680054]
